# Supplementary material
Source: PubMed Central journal article supplement (PMC546140)
Supplement: nar_33_1_95__1.pdf [file nar_33_1_95__1.pdf]

| Domain Name                                                       | Domain Score |
|-------------------------------------------------------------------|--------------|
| PF01352:KRAB box                                                  | 0            |
| PF00008:EGF-like domain                                           | 0            |
| PF00084:Sushi domain (SCR repeat)                                 | 0.00E-01     |
| PF00041:Fibronectin type III domain                               | 2.36E-213    |
| PF00057:Low-density lipoprotein receptor domain class A           | 2.41E-105    |
| PF00023:Ankyrin repeat                                            | 2.90E-104    |
| PF00560:Leucine Rich Repeat                                       | 5.13E-93     |
| PF00047:Immunoglobulin domain                                     | 9.05E-80     |
| PF00643:B-box zinc finger                                         | 5.43E-74     |
| PF00053:Laminin EGF-like (Domains III and V)                      | 5.84E-73     |
| PF00431:CUB domain                                                | 7.09E-67     |
| PF00129:Class I Histocompatibility antigen, domains alpha 1 and 2 | 3.63E-59     |
| PF00096:Zinc finger, C2H2 type                                    | 1.59E-58     |
| PF00105:Zinc finger, C4 type (two domains)                        | 3.78E-57     |
| PF00530:Scavenger receptor cysteine-rich domain                   | 1.80E-56     |
| PF02023:SCAN domain                                               | 9.09E-54     |
| PF00058:Low-density lipoprotein receptor repeat class B           | 1.63E-49     |
| PF00090:Thrombospondin type 1 domain                              | 1.86E-47     |
| PF00038:Intermediate filament protein                             | 2.04E-45     |
| PF00993:Class II histocompatibility antigen, alpha domain         | 6.49E-45     |
| PF00030:Beta/Gamma crystallin                                     | 1.46E-42     |
| PF00193:Extracellular link domain                                 | 4.13E-36     |
| PF01826:Trypsin Inhibitor like cysteine rich domain               | 2.88E-33     |
| PF00002:7 transmembrane receptor (Secretin family)                | 2.25E-29     |
| PF00093:von Willebrand factor type C domain                       | 1.05E-28     |
| PF00017:SH2 domain                                                | 6.37E-27     |
| PF00969:Class II histocompatibility antigen, beta domain          | 9.16E-27     |
| PF01023:S-100/ICaBP type calcium binding domain                   | 5.35E-26     |
| PF00335:Tetraspanin family                                        | 2.86E-25     |
| PF01391:Collagen triple helix repeat (20 copies)                  | 4.54E-24     |
| PF00412:LIM domain                                                | 2.28E-23     |
| PF00916:Sulfate transporter family                                | 3.23E-23     |
| PF00683:TB domain                                                 | 5.07E-22     |
| PF01049:Cadherin cytoplasmic region                               | 3.11E-20     |
| PF00050:Kazal-type serine protease inhibitor domain               | 6.31E-20     |
| PF02176:TRAF-type zinc finger                                     | 4.99E-19     |
| PF01825:Latrophilin/CL-1-like GPS domain                          | 5.61E-19     |
| PF00400:WD domain, G-beta repeat                                  | 8.21E-19     |
| PF01463:Leucine rich repeat C-terminal domain                     | 1.26E-18     |
| PF00754:F5/8 type C domain                                        | 2.17E-17     |
| PF00048:Small cytokines (intecrine/chemokine), interleukin-8 like | 6.58E-17     |
| PF01833:IPT/TIG domain                                            | 1.40E-16     |
| PF02946:GTF2I-like repeat                                         | 1.48E-16     |
| PF00320:GATA zinc finger                                          | 2.63E-16     |
| PF00040:Fibronectin type II domain                                | 3.07E-16     |
| PF02820:mbt repeat                                                | 1.01E-15     |
| PF00337:Galactoside-binding lectin                                | 2.16E-15     |
| PF00452:Apoptosis regulator proteins, Bcl-2 family                | 2.68E-15     |
| PF00051:Kringle domain                                            | 2.69E-15     |
| PF00989:PAS domain                                                | 1.05E-14     |
| PF00373:FERM domain (Band 4.1 family)                             | 1.20E-14     |

|                                                                                 |          |
|---------------------------------------------------------------------------------|----------|
| PF00357: Integrin alpha cytoplasmic region                                      | 1.31E-14 |
| PF00785: PAC motif                                                              | 2.72E-14 |
| PF00188: SCP-like extracellular protein                                         | 4.23E-14 |
| PF00209: Sodium: neurotransmitter symporter family                              | 5.66E-14 |
| PF02736: Myosin N-terminal SH3-like domain                                      | 2.06E-13 |
| PF00063: Myosin head (motor domain)                                             | 3.45E-12 |
| PF00625: Guanylate kinase                                                       | 3.51E-12 |
| PF00014: Kunitz/Bovine pancreatic trypsin inhibitor domain                      | 4.76E-12 |
| PF01462: Leucine rich repeat N-terminal domain                                  | 4.83E-12 |
| PF01431: Peptidase family M13                                                   | 5.32E-12 |
| PF00273: Serum albumin family                                                   | 5.50E-12 |
| PF01404: Ephrin receptor ligand binding domain                                  | 6.91E-12 |
| PF00089: Trypsin                                                                | 9.47E-12 |
| PF00594: Vitamin K-dependent carboxylation/gamma-carboxyglutamic (GLA) domain   | 1.04E-11 |
| PF00413: Matrixin                                                               | 1.05E-11 |
| PF01477: PLAT/LH2 domain                                                        | 1.28E-11 |
| PF01530: Zinc finger, C2HC type                                                 | 1.35E-11 |
| PF00059: Lectin C-type domain                                                   | 1.37E-11 |
| PF00305: Lipoxygenase                                                           | 1.62E-11 |
| PF01841: Transglutaminase-like superfamily                                      | 4.76E-11 |
| PF00703: Glycosyl hydrolases family 2, immunoglobulin-like beta-sandwich domain | 5.90E-11 |
| PF00323: Mammalian defensin                                                     | 1.24E-10 |
| PF00879: Defensin propeptide                                                    | 1.24E-10 |
| PF01437: Plexin repeat                                                          | 1.51E-10 |
| PF00349: Hexokinase                                                             | 1.52E-10 |
| PF00474: Sodium: solute symporter family                                        | 2.29E-10 |
| PF02189: Immunoreceptor tyrosine-based activation motif                         | 3.21E-10 |
| PF00061: Lipocalin / cytosolic fatty-acid binding protein family                | 6.18E-10 |
| PF03165: MH1 domain                                                             | 6.56E-10 |
| PF00026: Eukaryotic aspartyl protease                                           | 6.75E-10 |
| PF02244: Carboxypeptidase activation peptide                                    | 9.52E-10 |
| PF04103: CD20/IgE Fc receptor beta subunit family                               | 1.25E-09 |
| PF01562: Reprolysin family propeptide                                           | 1.28E-09 |
| PF02758: PAAD/DAPIN/Pyrin domain                                                | 1.77E-09 |
| PF00487: Fatty acid desaturase                                                  | 2.25E-09 |
| PF00024: PAN domain                                                             | 2.44E-09 |
| PF00207: Alpha-2-macroglobulin family                                           | 2.64E-09 |
| PF01403: Sema domain                                                            | 3.39E-09 |
| PF00501: AMP-binding enzyme                                                     | 4.07E-09 |
| PF03727: Hexokinase                                                             | 6.22E-09 |
| PF00069: Protein kinase domain                                                  | 6.81E-09 |
| PF00131: Metallothionein                                                        | 6.84E-09 |
| PF00021: u-PAR/Ly-6 domain                                                      | 8.89E-09 |
| PF01839: FG-GAP repeat                                                          | 1.04E-08 |
| PF01067: Calpain large subunit, domain III                                      | 1.20E-08 |
| PF02412: Thrombospondin type 3 repeat                                           | 1.28E-08 |
| PF01186: Lysyl oxidase                                                          | 1.65E-08 |
| PF02209: Villin headpiece domain                                                | 2.39E-08 |
| PF03921: Intercellular adhesion molecule (ICAM), N-terminal domain              | 3.21E-08 |
| PF00092: von Willebrand factor type A domain                                    | 3.44E-08 |
| PF00039: Fibronectin type I domain                                              | 3.83E-08 |
| PF04617: Hox9 activation region                                                 | 4.37E-08 |

|                                                                                     |          |
|-------------------------------------------------------------------------------------|----------|
| PF00652:QXW lectin repeat                                                           | 4.75E-08 |
| PF00554:Rel homology domain (RHD)                                                   | 4.88E-08 |
| PF04775:Acyl-CoA thioester hydrolase / Bile acid-CoA amino acid N-acetyltransferase | 5.05E-08 |
| PF01582:TIR domain                                                                  | 5.07E-08 |
| PF00271:Helicase conserved C-terminal domain                                        | 6.00E-08 |
| PF01759:NTR/C345C module                                                            | 6.95E-08 |
| PF00095:WAP-type (Whey Acidic Protein) 'four-disulfide core'                        | 7.40E-08 |
| PF04810:Sec23/Sec24 zinc finger                                                     | 8.38E-08 |
| PF02118:C.elegans Srg family integral membrane protein                              | 8.41E-08 |
